# Supplementary material for: A Flexible Chemosensor Based on Colorimetric and Fluorescent Dual Modes for Rapid and Sensitive Detection of Hypochlorite Anion
Source: MDPI journal article supplement (doi:10.3390/s21238082), 2021-12-03
Supplement: s1 [file s1]

## Supplementary Materials:

# A Flexible Chemosensor Based on Colorimetric and Fluorescent Dual Modes for Rapid and Sensitive Detection of Hypochlorite Anion

Qin Wu <sup>1</sup>, Tao Tao <sup>1,2,\*</sup>, Yunxia Zhao <sup>1</sup> and Wei Huang <sup>2</sup>

<sup>1</sup> Institute of Advanced Materials and Flexible Electronics (IAMFE), School of Chemistry and Materials Science, Nanjing University of Information Science & Technology (NUIST), Nanjing 210044, China; 20191213038@nuist.edu.cn (Q.W.); nlgyzx@nuist.edu.cn (Y.Z.)

<sup>2</sup> School of Chemistry and Chemical Engineering, Nanjing University, Nanjing 210093, China; whuang@nju.edu.cn

\* Correspondence: taotao@nuist.edu.cn

## Experimental Details

### 1. aggregation-induced emission (AIE) experiment

Herein, the 4',4'',4''',4''''-(ethene-1,1,2,2-tetrayl)tetrakis((1,1'-biphenyl)-4-amine)) (TPE4A) was dissolved in tetrahydrofuran (THF) into 400  $\mu$ M solution (mother liquor). Next, take 10 glass bottles of 10 ml numbered 0-90 and add 1 ml of the above solution to each bottle, and then add deionized water according to the ratio of 0-90% of water content, and finally use tetrahydrofuran to form 10 ml mixed solution. Finally, the data analysis via UV test and fluorescence test were indicated that the moisture content reaches 80%, the fluorescence intensity is maximum.

### 2. Titration experiment with ClO<sup>-</sup>

Prepared 5 mM concentration of hypochlorite solution, 2.5 mL fluorescent probe with a moisture content of 80% was added to a clean colorimetric dish. Add 0-25 equivalent of the above hypochlorite solution to it gradually. The data analysis via UV test and fluorescence test.

### 3. Selective experimental testing of TPE4A

The mixed solution of the fluorescent probe (40  $\mu$ M, THF/water = 1:4) got ready first. Afterward, prepared the analytes with a concentration of 1000 $\mu$ M (ClO<sup>-</sup>, SCN<sup>-</sup>, CO<sub>3</sub><sup>2-</sup>, S<sup>2-</sup>, NO<sup>2-</sup>, H<sub>2</sub>O<sub>2</sub>, F<sup>-</sup>), Then carried the fluorescence test by fluorescence testing device.

### 4. Preparation of experimental details and testing of paper-based sensor

We used a melt-blown fiber test paper material, cut into a 1 cm × 1 cm square lattice, immersed in a concentration of 40 μM TPE4A solution for 24 h, leaving the fiber paper-based material in full contact with the **TPE4A** solution. Next, the Paper-based sensor was removed to dry for standby. Preparation of serial concentrations of ClO<sup>-</sup> ( $5.0 \times 10^{-4}$  M,  $1.0 \times 10^{-3}$  M,  $5.0 \times 10^{-3}$  M,  $1.0 \times 10^{-2}$  M,  $5.0 \times 10^{-2}$  M,  $1.0 \times 10^{-1}$  M). Then a drop of different concentrations of ClO<sup>-</sup> solution was dropped to the paper-based sensor, and fluorescence intensity changes were observed and photographed under a 365 UV lamp and recorded. After the sensor is dried, the color change of the sensor was visually observed and the photo was recorded.

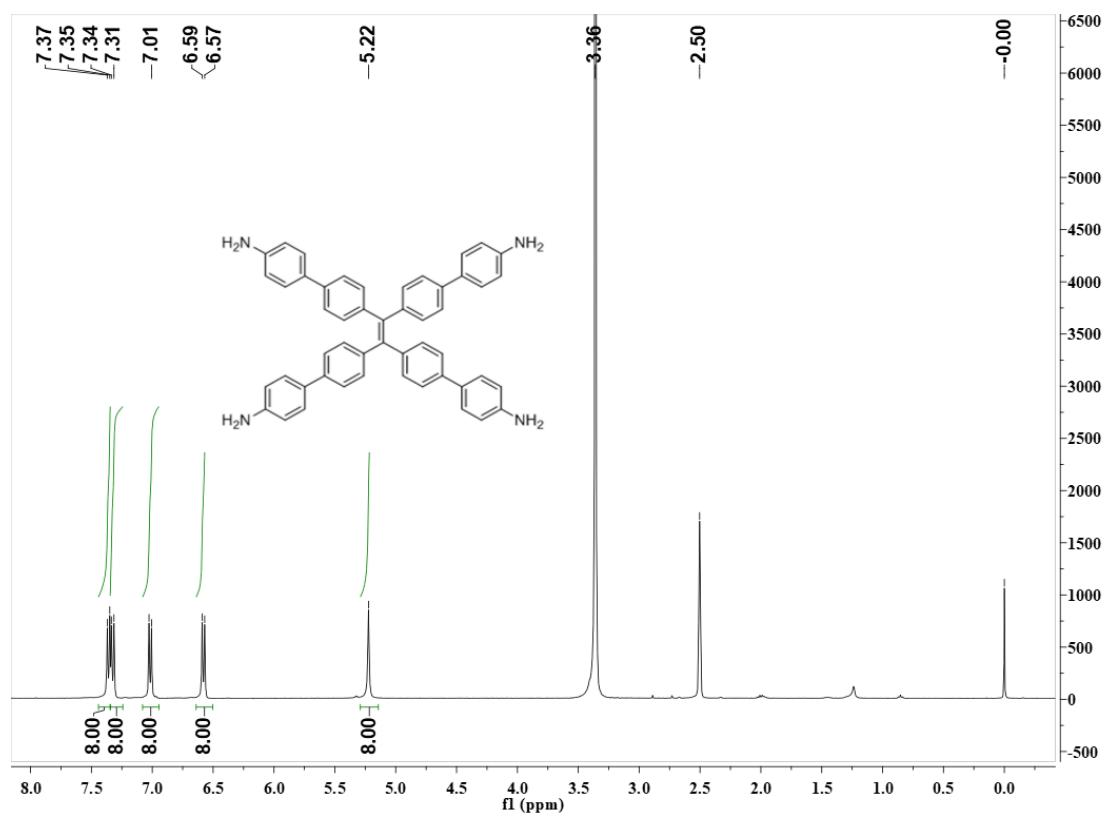

**Figure S1.** <sup>1</sup>H NMR of **TPE4A** in d<sup>6</sup>-DMSO

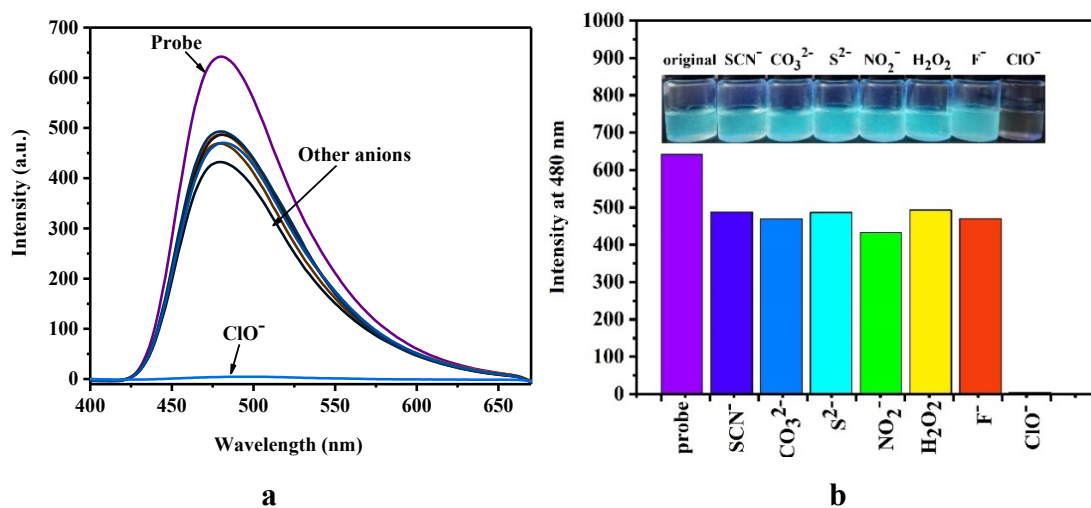

**Figure S2.** Fluorescent emission (a) and intensities at 480 nm (b) of probe **TPE4A** (40  $\mu\text{M}$ ) in mixed solution ( $f_w = 80\%$ ) upon exposure to other analytes ( $\text{SCN}^-$ ,  $\text{CO}_3^{2-}$ ,  $\text{S}^{2-}$ ,  $\text{NO}_2^-$ ,  $\text{H}_2\text{O}_2$  and  $\text{F}^-$ ). Inset: selective fluorescent change photograph for  $\text{ClO}^-$  and other analytes.

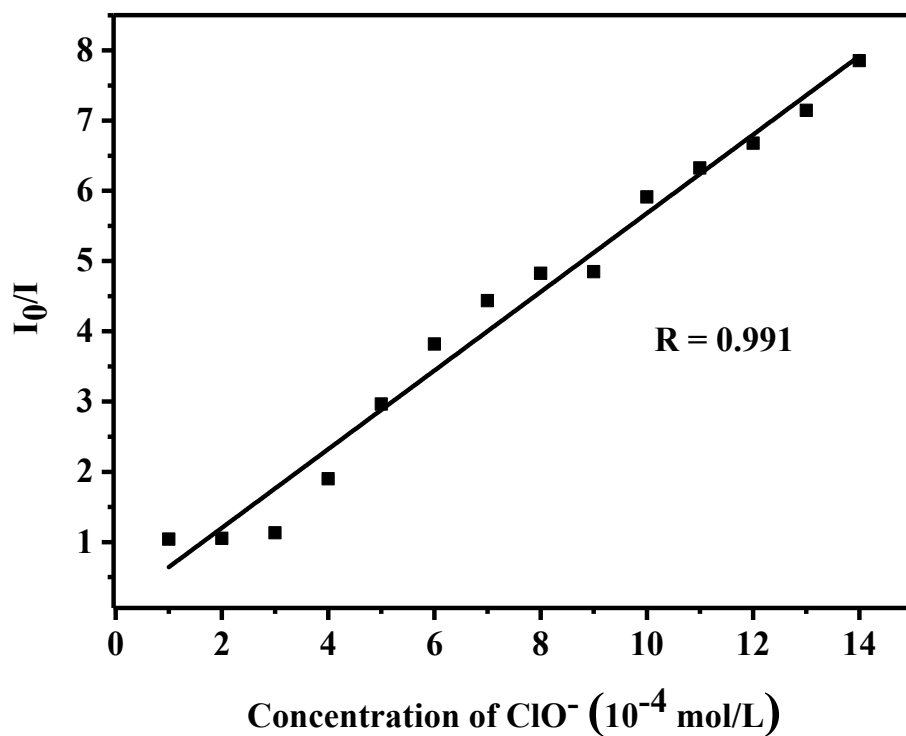

**Figure S3.** Fitting plot for compound **1** with the addition of different contentions of **TPE4A** in THF solution to calculate the limit of detection.

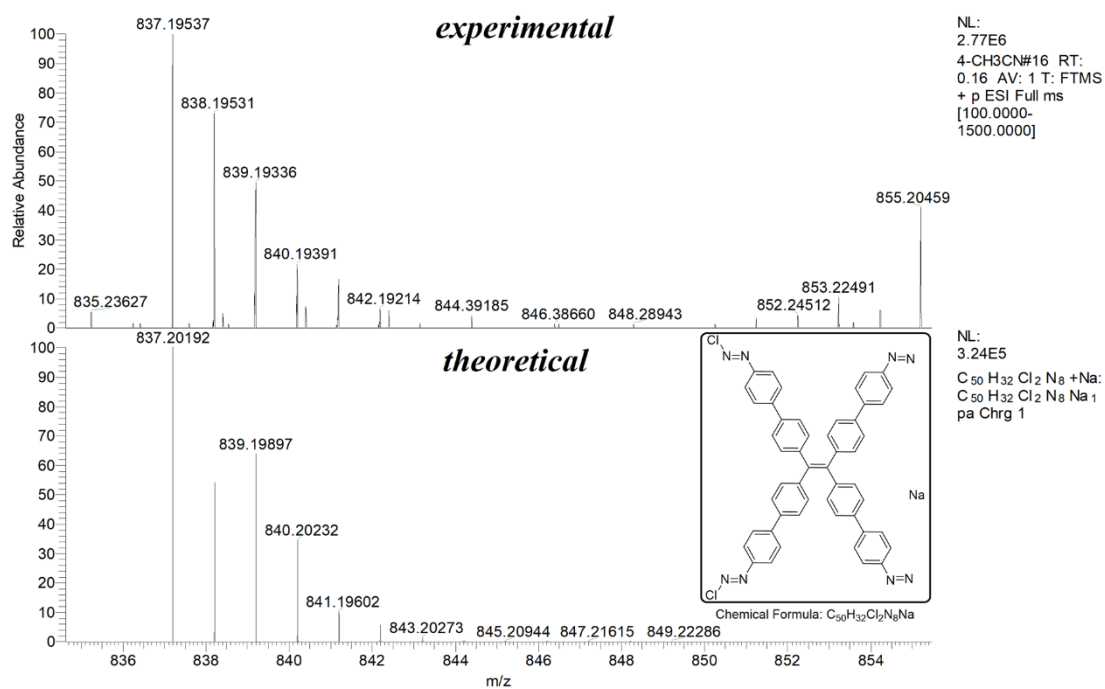

**Figure S4.** The experimental and theoretical ESI-MS of the product obtained by mixing probe NaOCl

**Table S1.** The HOMOs and LUMOs of compounds **TPE4A** and **TPE4A-NNCl**.

| compound          | HOMOs                                                                                          | LUMOs                                                                                           |
|-------------------|------------------------------------------------------------------------------------------------|-------------------------------------------------------------------------------------------------|
| <b>TPE4A</b>      | 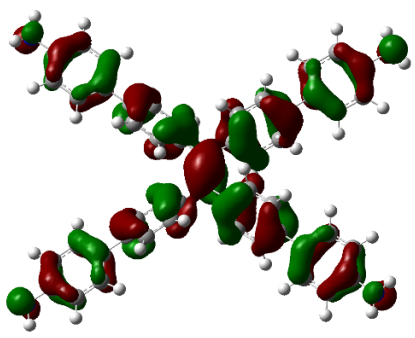<br>—4.62 eV  | <br>—1.18 eV  |
| <b>TPE4A-NNCl</b> | <br>—5.98 eV | <br>—2.81 eV |
